# Supplementary material
Source: PubMed Central journal article supplement (PMC3386138)
Supplement: 1120248109_pnas.201120248SI.pdf [file 1120248109_pnas.201120248SI.pdf]

# Supporting Information

Archin et al. 10.1073/pnas.1120248109

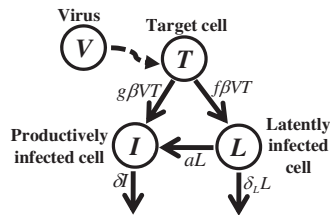

**Fig. S1.** Schematic diagram of the viral dynamic model (Eqs. 1 and 2). Symbols are defined in the text. We assume that a fraction,  $f$ , of infection events generates latently infected cells with replication competent genomes; a fraction contains “dead” proviruses detectable by PCR but incapable of reactivation (not shown); and the remaining fraction of infection events,  $g$ , leads to productively infected cells.

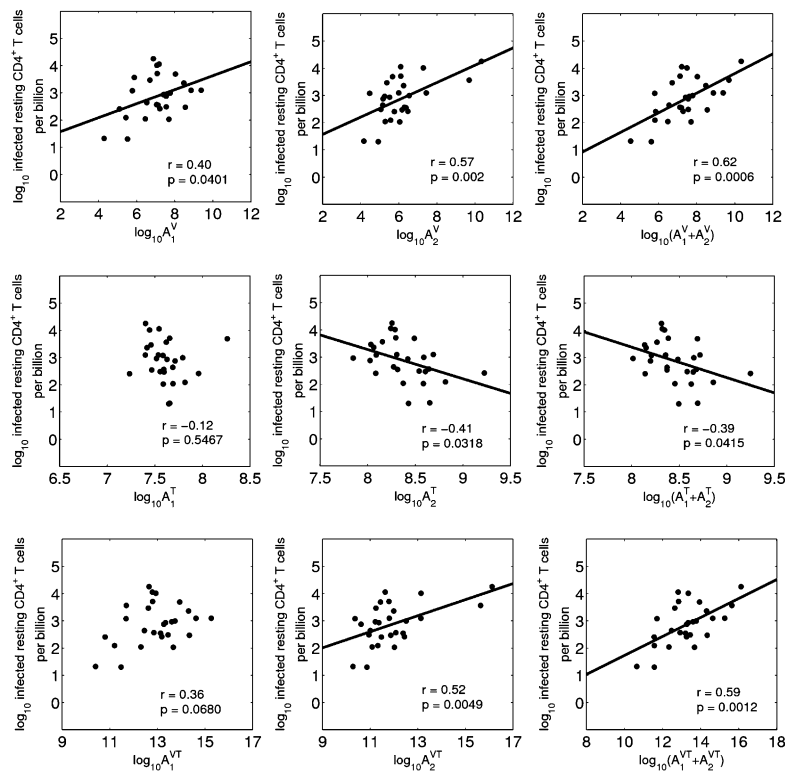

**Fig. S2.** Correlation analysis. (Top row) Relationship between measured RCI frequency and (Left panel) area under the viral load curve from the time of infection to the time of ART initiation. (Middle panel) Area under the viral load curve from the time of ART initiation to the time of the first leukopheresis (when the RCI frequency was measured). (Right panel) Area under the viral load curve from the time of infection to the time of first leukopheresis. (Middle row) Similar analysis but for areas under the CD4<sup>+</sup> T-cell curve. (Bottom row) similar analysis but for areas under the  $V(t)T(t)$  curve.

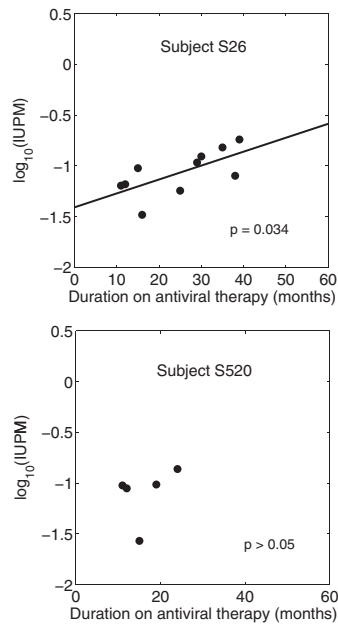

Fig. S3. Frequency of RCI in the two patients on stable ART who showed no decline in RCI. The apparent increase in RCI frequency represents a difference of one or two positive cultures of the 36 or more that were done for each data point, and thus the change may not actually be significant.

Table S1. Clinical characteristics of patients who had multiple leukophereses

| Patient | Year of diagnosis | ART regimen   | Months from ART start to <50 copies/mL | CD4 count at initiation of ART (cells/ $\mu$ L) | Most recent CD4 count (cells/ $\mu$ L) |
|---------|-------------------|---------------|----------------------------------------|-------------------------------------------------|----------------------------------------|
| S25     | 2004              | FPV/r/ABC/3TC | 6                                      | 439                                             | 1,143                                  |
| S26     | 2004              | EFV+TDF+FTC   | 1                                      | 541                                             | 798                                    |
| S231    | 2006              | EFV+TDF+FTC   | 3                                      | 277                                             | 690                                    |
| S237    | 2006              | ATV/r/ABC+3TC | 4                                      | 389                                             | 537                                    |
| S256    | 2008              | EFV+TDF+FTC   | 1                                      | 630                                             | 763                                    |
| S257    | 2008              | EFV+TDF+FTC   | 8                                      | 137                                             | 496                                    |
| S368    | 2008              | EFV+TDF+FTC   | 7                                      | 933                                             | 1,087                                  |
| S396    | 2009              | DRV/r/ETR     | 3                                      | 1,022                                           | 841                                    |
| S416    | 2009              | DRV/r/ETR     | 5                                      | 629                                             | 907                                    |
| S520    | 2004              | TDF/FTC/NVP   | 3                                      | 320                                             | 840                                    |
| S521    | 2008              | EFV+TDF+FTC   | 4                                      | 849                                             | 1,495                                  |

ABC, abacavir; ATV, atazanavir; DRV, darunavir; EFV, efavirenz; ETR, etravirine; FPV, fosamprenavir; NVP, nevirapine; r, ritonavir; TDF, tenofovir.
